# Supplementary material for: Zeolites Reduce the Transfer of Potentially Toxic Elements from Soil to Leafy Vegetables
Source: MDPI journal article supplement (doi:10.3390/ma15165657), 2022-08-17
Supplement: s1 [file s1]

# Zeolites Reduce the Transfer of Potentially Toxic Elements from Soil to Leafy Vegetables

Oana Cadar <sup>1</sup>, Zamfira Stupar <sup>1</sup>, Marin Senila <sup>1</sup>, Levente Levei <sup>1,2</sup>, Ana Moldovan <sup>1</sup>, Anca Becze <sup>1</sup>, Alexandru Ozunu<sup>1,2</sup> and Erika Andrea Levei <sup>1,\*</sup>

<sup>1</sup> INCDO-INOE 2000, Research Institute for Analytical Instrumentation, 67 Donath Street, 400293 Cluj-Napoca, Romania

<sup>2</sup> Faculty of Environmental Sciences and Engineering, Babes-Bolyai University, 30 Fantanele Street, 400294 Cluj-Napoca, Romania

\* Correspondence: erika.levei@icia.ro

**Table S1** Bioaccumulation factor for shoots (BAFs) and for roots (BAFr) calculated for spinach, lettuce and parsley grown on soil-zeolite mixtures in proportion of 0 (control), 50 zeolite/kg soil (5%) and 100 g zeolite/kg soil (10%) using the pseudo total (PT), bioavailable (BA) or water soluble (WS) PTE fractions from soil.

| Dose    | PT   |      |      |      |      |      | WS   |      |      |      |      |      | BA   |      |      |      |      |      |
|---------|------|------|------|------|------|------|------|------|------|------|------|------|------|------|------|------|------|------|
|         | BAFs |      |      | BAFr |      |      | BAFs |      |      | BAFr |      |      | BAFs |      |      | BAFr |      |      |
|         | 0    | 5    | 10   | 0    | 5    | 10   | 0    | 5    | 10   | 0    | 5    | 10   | 0    | 5    | 10   | 0    | 5    | 10   |
| Spinach |      |      |      |      |      |      |      |      |      |      |      |      |      |      |      |      |      |      |
| Cd      | 0.09 | 0.08 | 0.07 | 0.34 | 0.34 | 0.35 | 79.8 | 75.8 | 65.2 | 311  | 313  | 329  | 0.43 | 0.40 | 0.31 | 1.69 | 1.66 | 1.57 |
| Cr      | 0.18 | 0.18 | 0.12 | 0.26 | 0.23 | 0.17 | 113  | 108  | 78.7 | 157  | 142  | 107  | 5.42 | 5.27 | 5.06 | 7.50 | 6.90 | 6.87 |
| Co      | 0.02 | 0.02 | 0.01 | 0.17 | 0.11 | 0.02 | 15.0 | 13.3 | 10.3 | 142  | 89.6 | 13.2 | 0.32 | 0.30 | 0.28 | 2.99 | 1.99 | 0.36 |
| Cu      | 0.12 | 0.12 | 0.10 | 0.32 | 0.26 | 0.11 | 31.8 | 30.7 | 26.5 | 86.0 | 70.3 | 27.2 | 0.40 | 0.35 | 0.31 | 1.07 | 0.81 | 0.32 |
| Mn      | 0.03 | 0.02 | 0.02 | 0.14 | 0.11 | 0.09 | 127  | 132  | 140  | 598  | 634  | 601  | 0.74 | 0.59 | 0.55 | 3.49 | 2.81 | 2.37 |
| Ni      | 0.09 | 0.09 | 0.07 | 0.70 | 0.55 | 0.09 | 43.7 | 37.0 | 26.1 | 354  | 219  | 35.1 | 1.07 | 0.93 | 0.87 | 8.70 | 5.47 | 1.17 |
| Pb      | 0.01 | 0.01 | 0.01 | 0.28 | 0.20 | 0.03 | 19.2 | 18.2 | 16.6 | 739  | 600  | 100  | 0.05 | 0.04 | 0.03 | 1.75 | 1.34 | 0.21 |
| Zn      | 0.50 | 0.38 | 0.26 | 0.34 | 0.27 | 0.20 | 284  | 242  | 226  | 193  | 168  | 168  | 3.67 | 3.01 | 2.12 | 2.5  | 2.09 | 1.58 |
| Lettuce |      |      |      |      |      |      |      |      |      |      |      |      |      |      |      |      |      |      |
| Cd      | 0.34 | 0.30 | 0.26 | 1.02 | 0.95 | 0.33 | 306  | 271  | 247  | 932  | 868  | 311  | 1.66 | 1.43 | 1.18 | 5.05 | 4.6  | 1.48 |
| Cr      | 0.26 | 0.24 | 0.15 | 1.51 | 0.94 | 0.21 | 158  | 150  | 100  | 928  | 580  | 133  | 7.57 | 7.32 | 6.43 | 44.4 | 28.0 | 8.57 |
| Co      | 0.37 | 0.34 | 0.26 | 1.02 | 0.68 | 0.29 | 316  | 286  | 230  | 861  | 572  | 250  | 6.65 | 6.35 | 6.23 | 18.1 | 13.0 | 6.78 |
| Cu      | 0.14 | 0.11 | 0.10 | 0.29 | 0.24 | 0.12 | 37.8 | 30.6 | 24.9 | 79   | 63.9 | 29.6 | 0.47 | 0.35 | 0.29 | 0.98 | 0.70 | 0.35 |
| Mn      | 0.03 | 0.02 | 0.02 | 0.79 | 0.47 | 0.16 | 112  | 126  | 108  | 3490 | 2684 | 1120 | 0.65 | 0.56 | 0.43 | 20.4 | 12.0 | 4.42 |
| Ni      | 0.74 | 0.81 | 0.60 | 1.88 | 2.08 | 0.72 | 375  | 323  | 234  | 947  | 833  | 281  | 9.21 | 8.07 | 7.79 | 23.3 | 20.8 | 9.38 |
| Pb      | 0.06 | 0.05 | 0.03 | 0.89 | 0.71 | 0.04 | 168  | 141  | 86.4 | 2359 | 2144 | 135  | 0.40 | 0.31 | 0.18 | 5.58 | 4.77 | 0.28 |
| Zn      | 0.08 | 0.06 | 0.04 | 1.16 | 0.73 | 0.13 | 47.7 | 36.9 | 34.8 | 665  | 460  | 111  | 0.62 | 0.46 | 0.33 | 8.60 | 5.71 | 1.05 |
| Parsley |      |      |      |      |      |      |      |      |      |      |      |      |      |      |      |      |      |      |
| Cd      | 0.02 | 0.02 | 0.01 | 0.09 | 0.07 | 0.02 | 17.4 | 16.4 | 6.30 | 84.1 | 64.1 | 15.9 | 0.09 | 0.09 | 0.03 | 0.46 | 0.34 | 0.08 |
| Cr      | 0.07 | 0.03 | 0.02 | 0.11 | 0.06 | 0.03 | 43.1 | 21.5 | 15.1 | 64.5 | 39.2 | 18.9 | 2.06 | 1.05 | 0.97 | 3.09 | 1.91 | 1.21 |
| Co      | 0.01 | 0.01 | 0.01 | 0.05 | 0.03 | 0.01 | 8.90 | 7.90 | 5.10 | 40.0 | 24.9 | 7.5  | 0.19 | 0.18 | 0.14 | 0.84 | 0.55 | 0.20 |
| Cu      | 0.12 | 0.09 | 0.09 | 0.21 | 0.17 | 0.10 | 33.2 | 25.0 | 22.8 | 56.3 | 45.0 | 24.2 | 0.41 | 0.29 | 0.27 | 0.70 | 0.52 | 0.28 |
| Mn      | 0.02 | 0.02 | 0.01 | 0.07 | 0.05 | 0.02 | 94.4 | 95.8 | 94.3 | 329  | 288  | 107  | 0.55 | 0.42 | 0.37 | 1.92 | 1.28 | 0.42 |
| Ni      | 0.24 | 0.27 | 0.18 | 0.43 | 0.44 | 0.26 | 120  | 107  | 69.3 | 218  | 175  | 100  | 2.95 | 2.68 | 2.31 | 5.35 | 4.37 | 3.33 |
| Pb      | 0.01 | 0.01 | 0.01 | 0.08 | 0.05 | 0.04 | 35.4 | 31.2 | 25.7 | 221  | 145  | 119  | 0.08 | 0.07 | 0.05 | 0.52 | 0.32 | 0.25 |
| Zn      | 0.09 | 0.06 | 0.04 | 0.15 | 0.11 | 0.08 | 50.9 | 35.1 | 31.0 | 84.5 | 67.9 | 64.8 | 0.66 | 0.44 | 0.29 | 1.09 | 0.84 | 0.61 |

**Table S2.** Transfer factors of PTEs for spinach, lettuce and parsley grown in soil-zeolite mixtures in control (0), 50 g zeolite/kg soil amendment (5%) and 100 g zeolite/kg soil amendment (10%).

| TF        | Spinach |      |      | Lettuce |      |      | Parsley |      |      |
|-----------|---------|------|------|---------|------|------|---------|------|------|
|           | 0       | 5    | 10   | 0       | 5    | 10   | 0       | 5    | 10   |
| <b>Cd</b> | 0.26    | 0.24 | 0.20 | 0.33    | 0.31 | 0.80 | 0.21    | 0.26 | 0.40 |
| <b>Cr</b> | 0.72    | 0.76 | 0.74 | 0.17    | 0.26 | 0.75 | 0.67    | 0.55 | 0.80 |
| <b>Co</b> | 0.11    | 0.15 | 0.78 | 0.37    | 0.50 | 0.92 | 0.22    | 0.32 | 0.68 |
| <b>Cu</b> | 0.37    | 0.44 | 0.97 | 0.48    | 0.48 | 0.84 | 0.59    | 0.56 | 0.94 |
| <b>Mn</b> | 0.21    | 0.21 | 0.23 | 0.03    | 0.05 | 0.10 | 0.29    | 0.33 | 0.88 |
| <b>Ni</b> | 0.12    | 0.17 | 0.74 | 0.40    | 0.39 | 0.83 | 0.55    | 0.61 | 0.69 |
| <b>Pb</b> | 0.03    | 0.03 | 0.17 | 0.07    | 0.07 | 0.64 | 0.16    | 0.22 | 0.22 |
| <b>Zn</b> | 1.47    | 1.44 | 1.34 | 0.07    | 0.08 | 0.31 | 0.60    | 0.52 | 0.48 |
